# Supplementary material
Source: publisher site journal article supplement (https://www.dovepress.com/article/375173)

# Supporting Information:

**Supplementary Table 1 Dermatologists’ clinical practice attributes and distribution by zone and town-class**

| **Variables** | **Overall (N=303)N (%)** |
| --- | --- |
| **Zone** | |
| North | 83 (27.39) |
| East | 62 (20.46) |
| West | 74 (24.42) |
| South | 84 (27.72) |
| **Town-class** | |
| Metro | 162 (53.46) |
| Non-metro | 141 (46.53) |
| **Biological Usership** | |
| Aware and user of biologics | 153 (50.49) |
| Non-user of biologics | 150 (49.50) |
| **Type of practice** | |
| Private | 250 (82.51) |
| Public | 53 (17.49) |

**Supplementary Table 2 Patient demographics and distribution by zone and town-class**

| Variables | Overall (N=207)  N (%) |
| --- | --- |
| **Zone** | |
| North | 62 (29.95) |
| East | 42 (20.28) |
| West | 50 (24.15) |
| South | 53 (25.60) |
| **Town-class** | |
| Metro | 129 (62.31) |
| Non-Metro | 78 (37.68) |
| **Consultation behaviour** | |
| Private | 165 (79.71) |
| Public | 42 (20.28) |
| **Age** | |
| 18-25 years | 43 (20.77) |
| 26-40 years | 84 (40.57) |
| >40 years | 80 (38.64) |
| **Gender** | |
| Male | 125 (60.38) |
| Female | 82 (39.61) |
| **Severity of disease** | |
| PASI ≥ 10 | 91 (43.96) |
| BSA 3-10% | 9 (4.34) |
| BSA > 10% | 107 (51.69) |

**Supplementary Figure 1 Distribution of speciality of initial diagnosis**


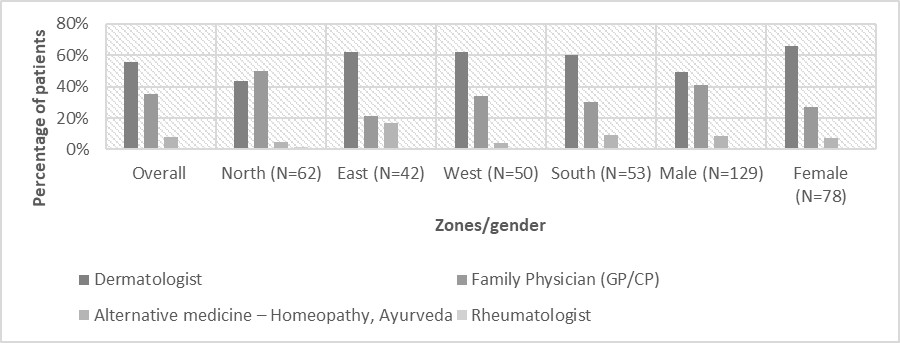

Supplement: Supplementary file 1 [file get_supplementary_file.php]
